# Supplementary material
Source: Royal Society of Chemistry journal article supplement (doi:10.1039/d6ma00196c)
Supplement: d6ma00196c1.pdf [file d6ma00196c1.pdf]

## Supporting Information

### **Porous NiCo<sub>2</sub>O<sub>4</sub> Nanorods as Efficient Catalysts for UV-Assisted Reduction of p-Nitrophenol**

Nanditha T K<sup>1</sup>, Mahi Varza Nataraajan<sup>1</sup>, Shreepooja Bhat<sup>1</sup>, Arun Kumar Thilipan<sup>2</sup>,  
Madhusudhan Alle<sup>3</sup>, Raghavendra K. G<sup>1</sup>, Gurumurthy S C<sup>1\*</sup>

<sup>1</sup>Manipal Institute of Technology, Manipal Academy of Higher Education, Manipal, India.

<sup>2</sup>Dr. Bansi Dhar Institute, Gurugram-122015, India

<sup>3</sup>Department of Chemistry, The University of Memphis, Memphis, TN 38152, USA

**Corresponding Author:** [gurumurthy.sc@manipal.edu](mailto:gurumurthy.sc@manipal.edu)

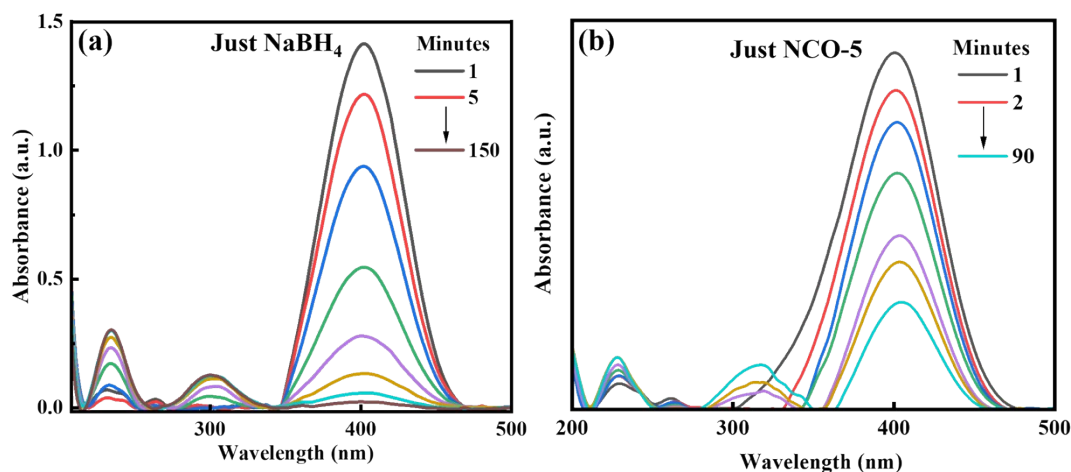

**Fig. S1.** UV-Vis spectral evolution of PNP reduction in the presence of (a) just NaBH<sub>4</sub> and (b) just NCO-5 NPs under UV illumination

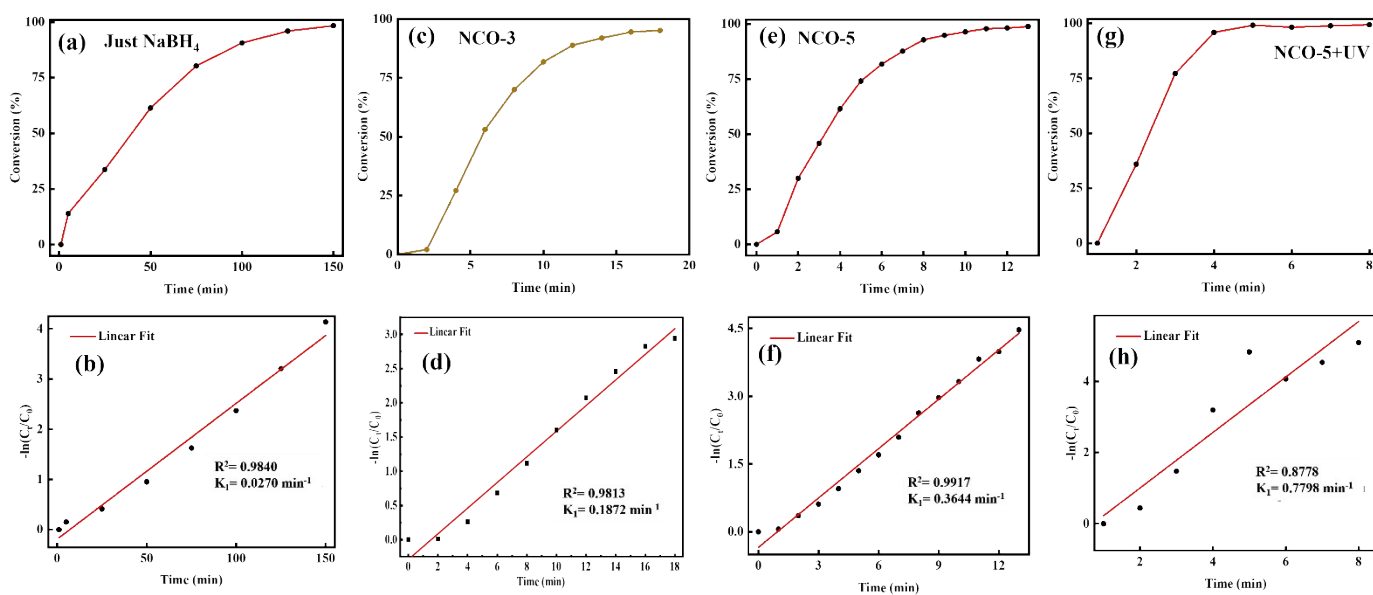

**Fig. S2.** Conversion percentage plot under various conditions and  $\ln(C_t/C_0)$  vs time graph for conversion in presence of NaBH<sub>4</sub> and (a,b) no catalyst, (c,d) NCO-3, (e,f) NCO-5 and (g,h) NCO-5 under UV illumination.

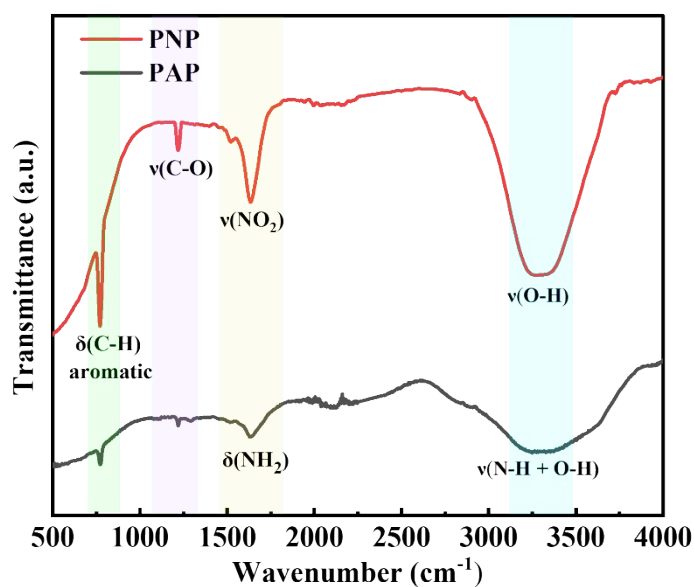

**Fig. S3.** FTIR of catalytic reaction solution before and after reduction of PNP.

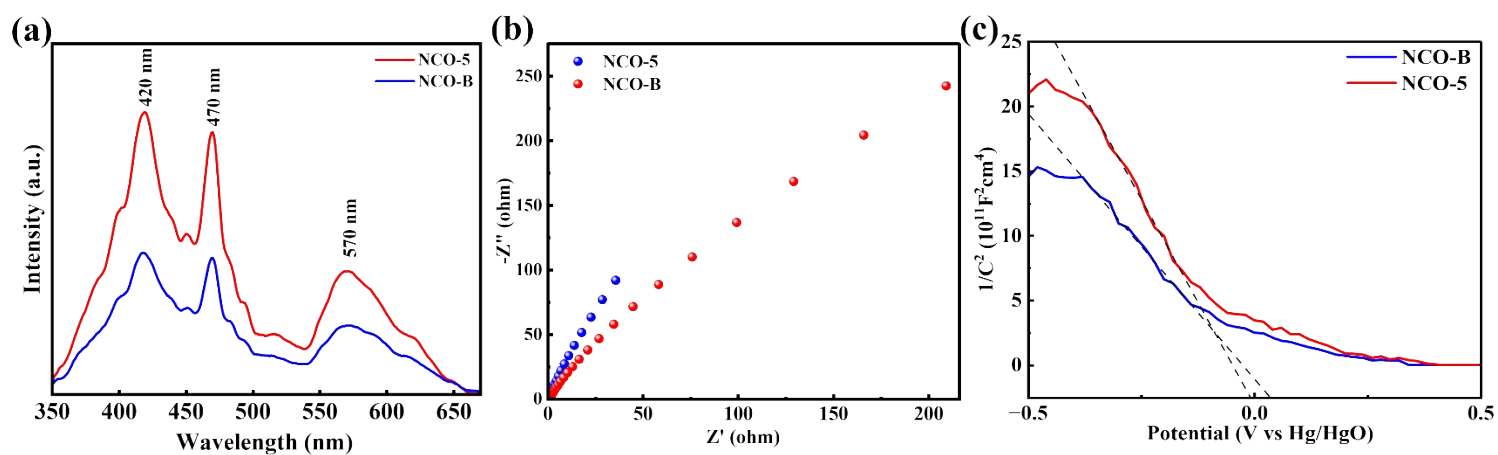

**Fig. S4.** (a) Photoluminescence spectra of NCO-B and NCO-5 samples; (b) electrochemical impedance spectroscopy (EIS) Nyquist plots of NCO-B and NCO-5 catalysts; (c) Mott-Schottky plots of NCO-B and NCO-5 samples recorded in 6 M KOH electrolyte.

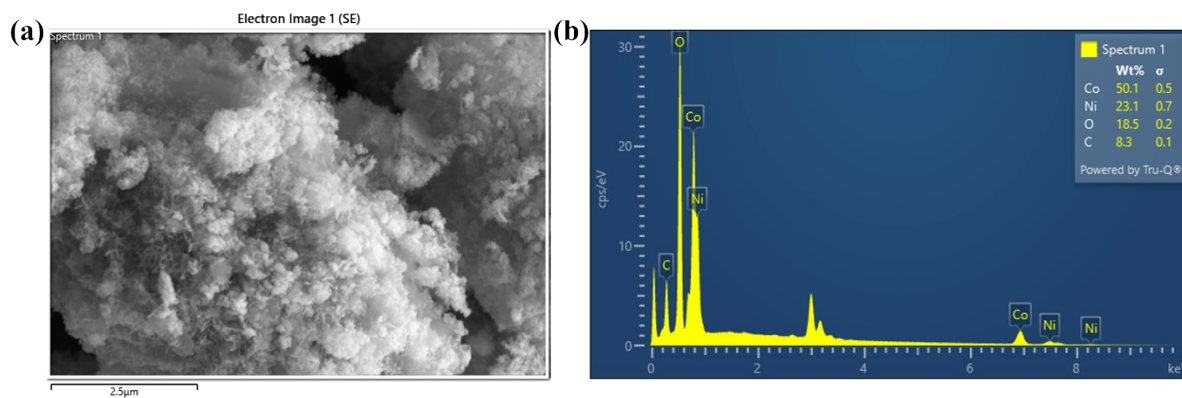

**Fig. S5.** FESEM electron image and corresponding EDS spectra of the recycled NCO-5 catalyst after 5 cycles.
